# Supplementary material for: Vortex preconditioning of the 2021 sudden stratospheric warming: barotropic–baroclinic instability associated with the double westerly jets
Source: Copernicus journal article supplement (doi:10.5194/acp-23-10869-2023), 2023-10-05
Supplement: Supplementary file 1 [file acp-23-10869-2023-supplement.pdf]

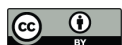

*Supplement of*

## **Vortex preconditioning of the 2021 sudden stratospheric warming: barotropic–baroclinic instability associated with the double westerly jets**

**Ji-Hee Yoo et al.**

*Correspondence to:* Hye-Yeong Chun ([chunhy@yonsei.ac.kr](mailto:chunhy@yonsei.ac.kr))

The copyright of individual parts of the supplement might differ from the article licence.

# 3 Jan (Lag = -2)

## Zonal GWD

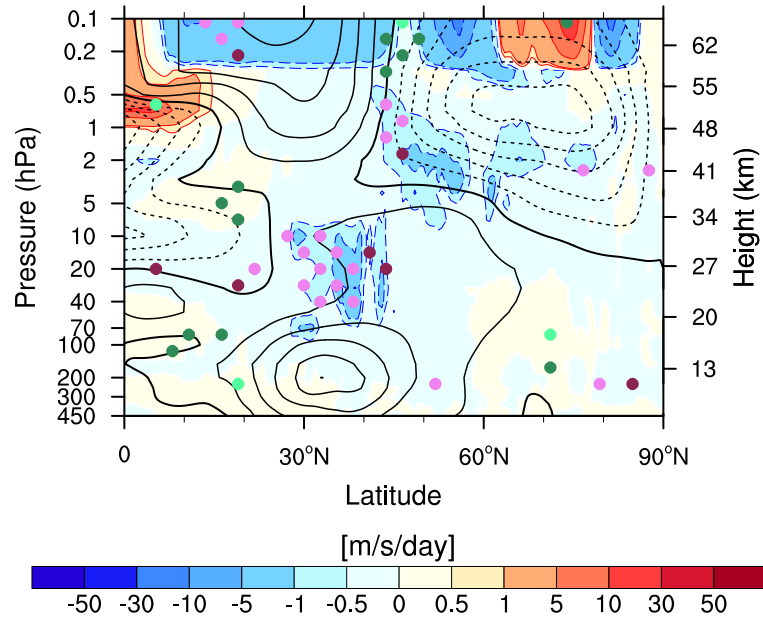

1

2 **Figure S1.** Latitude-height cross section of the zonal component of the parameterized gravity wave forcing on 3  
3 January 2021. The black contours are the zonal-mean zonal winds. The solid, dashed, and thick solid lines denote  
4 positive, negative, and zero wind, respectively. Dots indicate the statistically significant regions (please refer to  
5 Figure 1).

6

# (a) Total

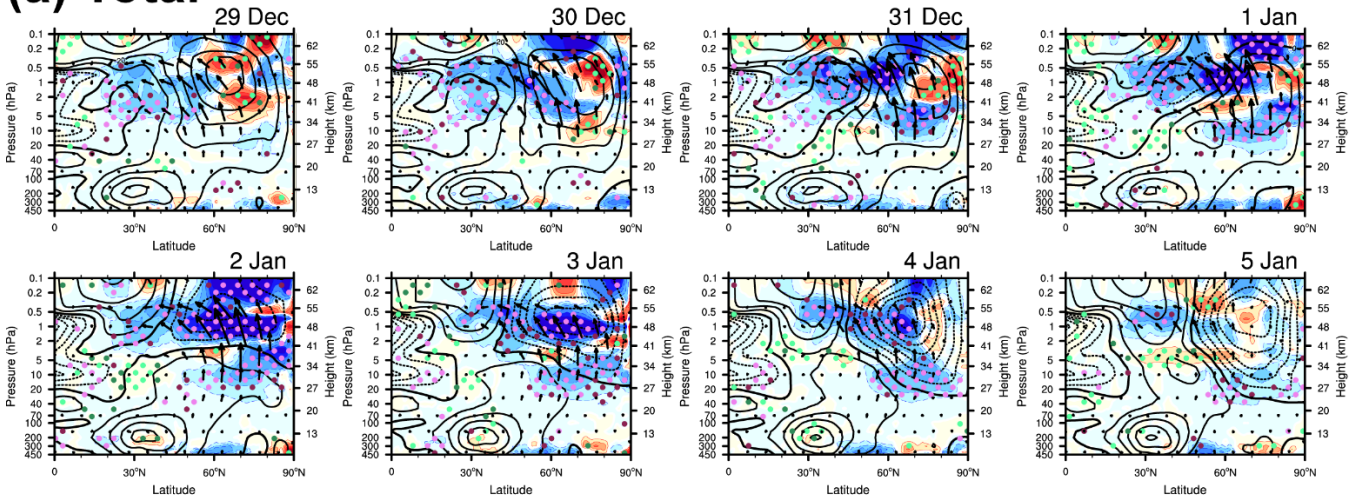

# (b) PW 1

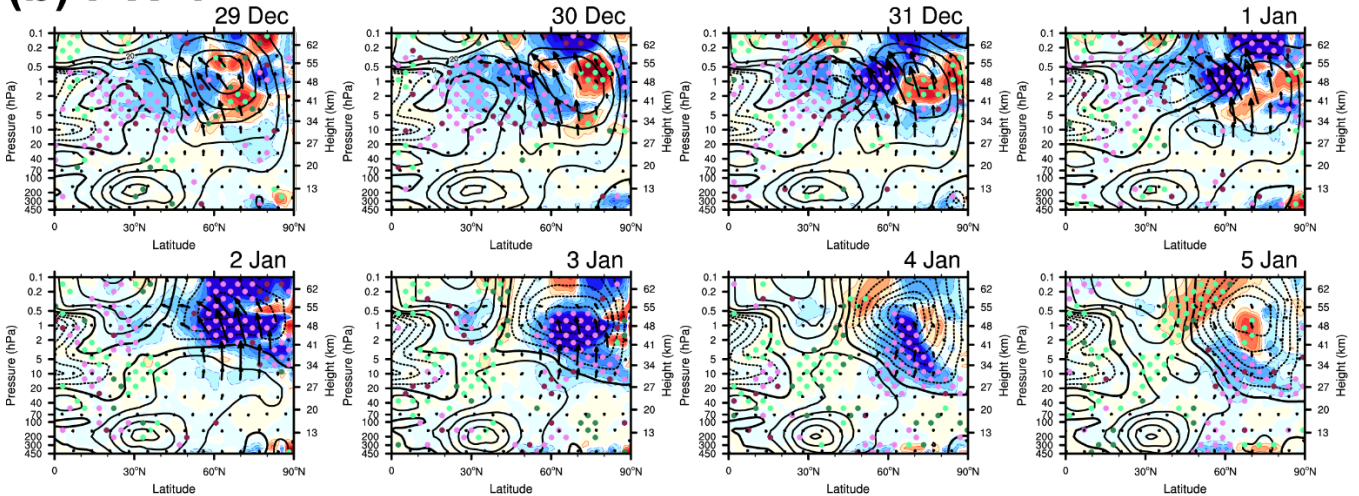

EPFD [m/s/day]

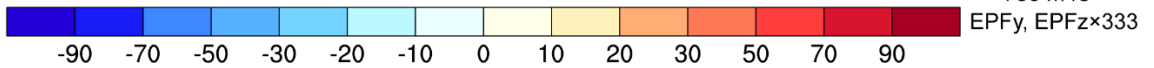

7

8

9

10

11

12

13

14

**Figure S2.** Latitude-height cross sections of EP-fluxes (vectors) overlaid on EPFD (colors) of (a) the resolved waves (Same as Figure 7b for comparison purpose) and (b) PW1 component from 29 December 2020 to 5 January 2021. The black contours in (a)–(b) are the zonal-mean zonal winds. The solid, dashed, and thick solid lines denote positive, negative, and zero wind, respectively. Dots indicate the statistically significant regions (please refer to Figure 1).

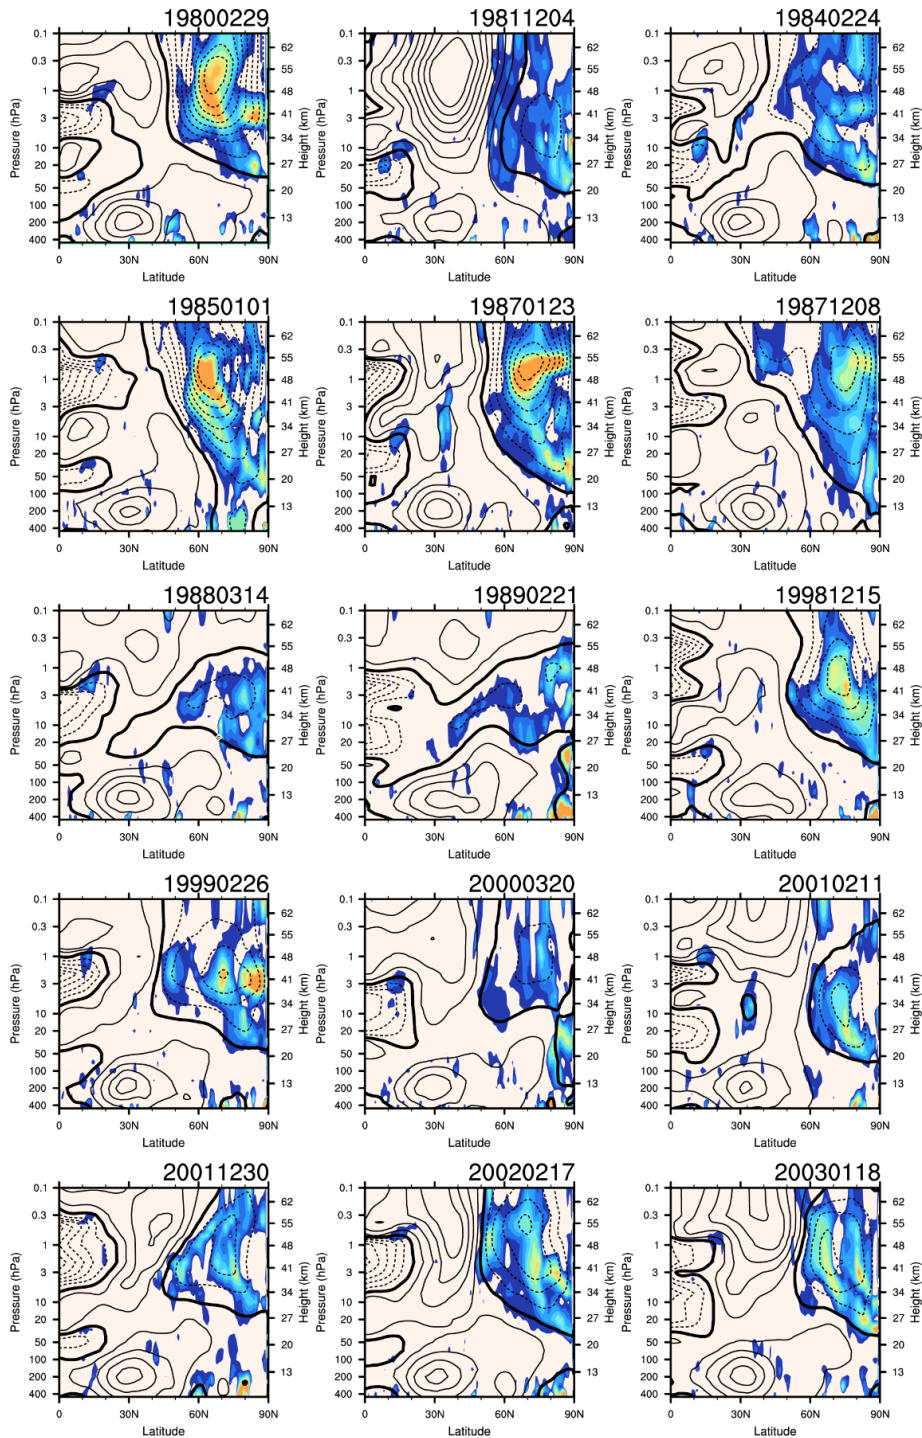

15

16 **Figure S3.** Latitude-height cross sections of negative  $\bar{q}_y$  (shading) and zonal-mean zonal wind (contours) at the  
 17 onset date of the major 26 SSW events selected following CP07. The solid, dashed, and thick solid lines indicate  
 18 positive, negative, and zero wind, respectively.

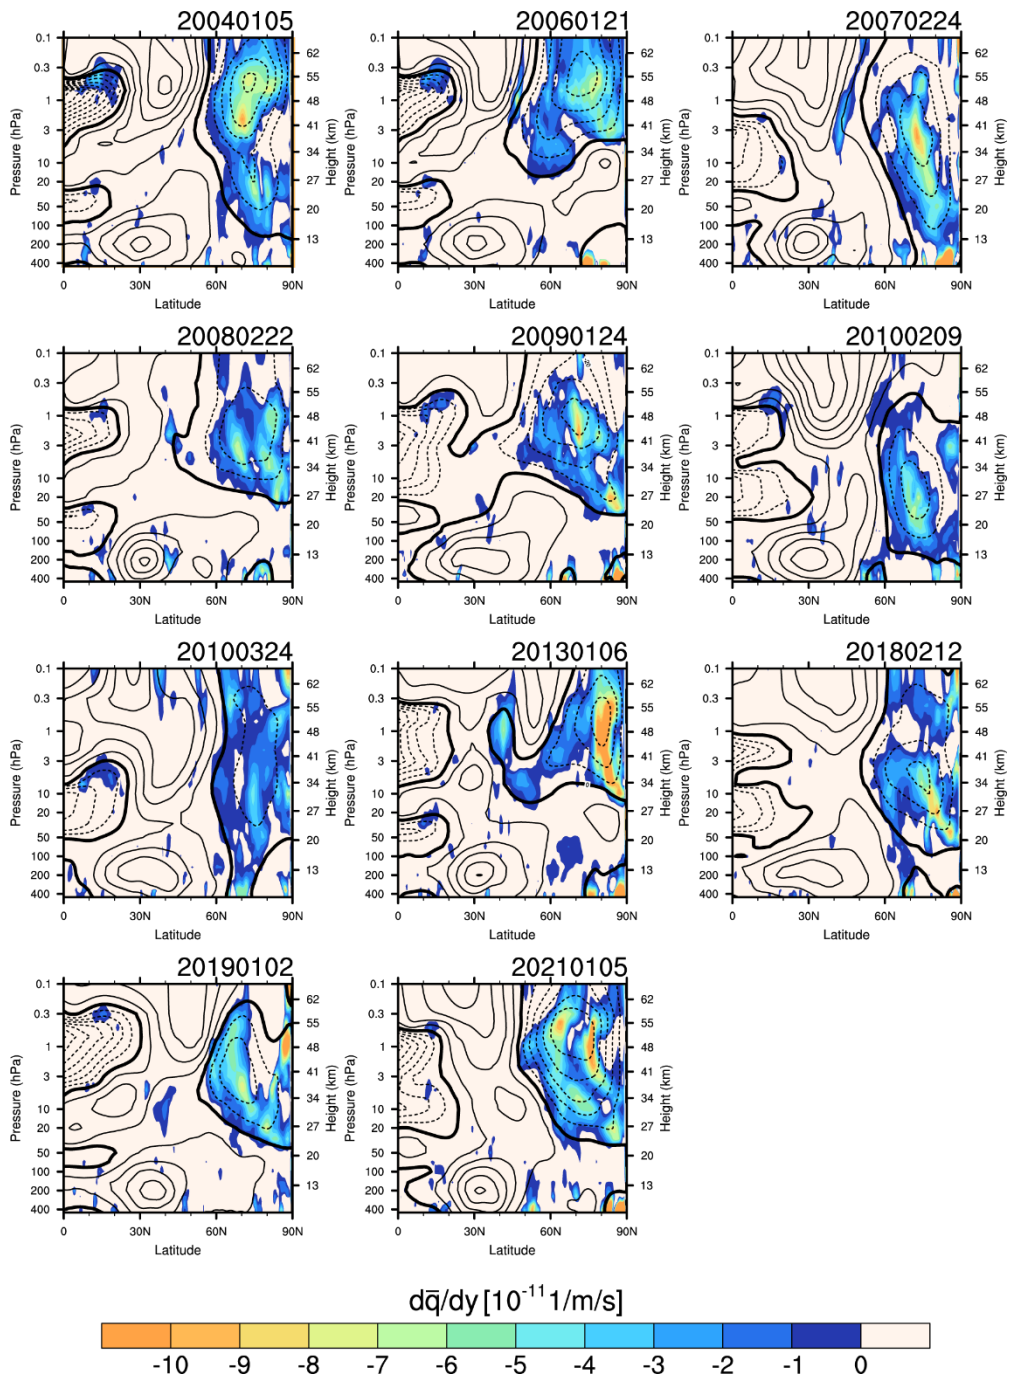

19  
20

Figure S3. (Continued)
